# Supplementary material for: Evidence of Multiple Pesticides Resistance in the Tomato Leaf Miner <em>Tuta Absoluta </em>Meyrick (1917) from Savannah Region of Northern Nigeria
Source: Preprints.org preprint supplement (doi:10.20944/preprints201808.0262.v1), 2018-08-15
Supplement: Supplementary file 1 [file supplementary]

**Table S1: Results of insecticides bioassay and leaf damage with various concentration of insecticides.**

| Insecticides        | n   | Mortality<br>± S.E.M. | LD <sub>50</sub> (ppm) | Leaf Damage<br>± S.E.M. |
|---------------------|-----|-----------------------|------------------------|-------------------------|
| λ-cyhalothrin       | 162 | 18.52±2.0             | 7461.474±1213.793      | 14.88±1.05              |
| Propoxur            | 162 | 55.55±5.02            | 1023.35±218.687        | 13.83±1.00              |
| Chlorpyrifos-methyl | 162 | 56.01±3.1             | 106.3032±13.094        | 13.06±1.06              |
| Abamectin           | 216 | 85.71±8.1             | 0.0338±0.00363         | 6.58± 1.10              |

Results are an average of percentage (9 larvae) for six different concentration ranges each of insecticides ± standard error of mean, for mortalities, LD<sub>50s</sub> and leaves damaged. S.E. = Standard error of mean and ppm = part per million. For control, percentage of mortalities and percentage leaf damage = 0.00±0.00 and 22.04±3.05, respectively.

**Table S2: Results of synergist bioassay and leaf damage with λ-cyhalothrin.**

| Treatment           | n   | % Mortality<br>± S.E.M. | LD <sub>50</sub> (ppm)± S.E.M. | SR        | % Leaf Damage<br>± S.E.M. |
|---------------------|-----|-------------------------|--------------------------------|-----------|---------------------------|
| λ-cyhalothrin       | 162 | 18.52*±2.0              | 7461.474±1213.793              |           | 14.88±1.05                |
| PBO + λ-cyhalothrin | 108 | 90.6*± 5.10             | 0.915± 0.15                    | 8154.3490 | 19.1± 3.31                |
| DEM+ λ-cyhalothrin  | 108 | 18.67± 5.50             | -                              | -         | 18.8± 1.3                 |
| TPP + λ-cyhalothrin | 108 | 19.44± 4.90             | -                              | -         | 19.3± 3.10                |

Mortality was recorded 56hr after the larvae had been treated with λ-cyhalothrin. Results are means ± standard error of mean (S.E.M.) of three replicates each of 27 larvae for each exposure. Synergistic ratio (SR) = ratio of the LD<sub>50</sub> of λ-cyhalothrin exposure in the conventional bioassay to the LD<sub>50</sub> of PBO + λ-cyhalothrin. \*significantly different from λ-cyhalothrin exposure alone in two-sided  $\chi^2$  test of significance ( $\chi^2 = 124.9$ ,  $p < 0.0001$ ).
